# Supplementary material for: Green palladium and platinum recovery by microwave-assisted aluminum chloride solution
Source: Royal Society of Chemistry journal article supplement (doi:10.1039/d4gc02503b), 2024-01-01
Supplement: d4gc02503b1.pdf [file d4gc02503b1.pdf]

# Electronic supplementary information

## Green palladium and platinum recovery by microwave-assisted aluminum chloride solution

Anting Ding,<sup>a,b</sup> Chuanying Liu,<sup>b</sup> Chengliang Xiao<sup>\*a,b</sup>

<sup>a</sup>College of Chemical and Biological Engineering, Zhejiang University, Hangzhou  
310058, China

<sup>b</sup>Institute of Zhejiang University-Quzhou, 99 Zheda Road, Quzhou 324000, China

\*Email: xiaoc@zju.edu.cn (C. XIAO)

Table of the contents

1. Supplementary Texts
2. Supplementary Figures
3. Supplementary Tables
4. Reference

## Supplementary Texts

**Text S1. Hammett Acidity Experiments.** UV-vis was used to analyze the Hammett acidity of different chloride solutions. Indicator 4-nitroaniline ( $pK_{BH^+} = 0.99$ , peak wavelength at 377.5 nm) was dissolved at a concentration of 8.5 mg/L in ethanol (to make an all-alkali-type solution), 98%  $H_2SO_4$  (to prepare an all-proton-type solution), and five chloride solutions. Following complete mixing, the solutions were left to sit at room temperature in the dark for 2 h before UV-vis measured. Proton transfer reaction occurs in the solution between indicator basic type B and its conjugated acid (proton type  $BH^+$ ):

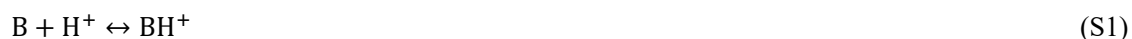

Ion balance defines Hammett acidity as follows:

$$H_0 = pK_{BH^+} - \lg(c_{BH^+})/c_B \quad (S2)$$

where  $pK_{BH^+}$  is the ion equilibrium constant of 4-nitroaniline (0.99), and the indicator's proton-type concentration to its base-type concentration is expressed as  $c_{BH^+}/c_B$ . According to Lambert-Beer law,  $c_{BH^+}/c_B$  at a fixed wavelength is as follows:

$$(c_{BH^+})/c_B = (A_B^\lambda - A^\lambda)/(A^\lambda - A_{BH^+}^\lambda) \quad (S3)$$

where  $A_B^\lambda$  is the indicator's all-alkali-type absorbance of the same concentration at a fixed wavelength degree,  $A_{BH^+}^\lambda$  is its all-proton-type absorption of the same concentration at the same wavelength degree, and  $A^\lambda$  is the indicator's absorbance in the medium being measured at the same conditions as  $A_B^\lambda$  and  $A_{BH^+}^\lambda$ .

**Text S2. Calculation of Energy Consumption and Chemical Inputs.** In the scale-up recovery process of Pd/C catalysts with seven cycles, the total chemicals consumption contained 7.84 g NaBH<sub>4</sub> (0.98 g for each cycle), 200 g AlCl<sub>3</sub>·6H<sub>2</sub>O and 200 g H<sub>2</sub>O. After 30 min of microwave-assisted leaching at 100 °C, the leachate was reduced by NaBH<sub>4</sub>. The total mass of leached Pd was calculated as:

$$M = m \sum_{i=0}^7 D_i \quad (\text{S4})$$

where  $M$  represents the total mass of leached Pd,  $m$  represents the mass of Pd in the catalysts put into each cycle (g),  $D_i$  represent the dissolution ratio in each cycle. The mass of leached Pd was calculated to be 8.648 g.

The total energy consumption contains the electricity utilization during the microwave-assisted leaching. The powder of the microwave reactor is 1800 W. Therefore, the energy consumption during the seven cycles was calculated as

$$\frac{1800 \text{ W} \times 1800 \text{ s} \times 8}{3600000 \text{ J/kW} \cdot \text{h}} = 7.2 \text{ kW} \cdot \text{h}$$

The cost of chemical inputs of 200 g AlCl<sub>3</sub>·6H<sub>2</sub>O, 7.84 g NaBH<sub>4</sub> (the cost of 200 g H<sub>2</sub>O was negligible) could be calculated according to the materials cost in **Table S7** as

$$200 \text{ g} \times \frac{\$12.64}{\text{kg}} \times 10^{-3} + 7.84 \times \frac{\$780.21}{\text{kg}} \times 10^{-3} = \$8.64$$

In total, 0.83 kW·h of energy and \$1.00 in material consumption were utilized per gram of Pd leached from spent Pd/C catalysts.

### Supplementary Figures

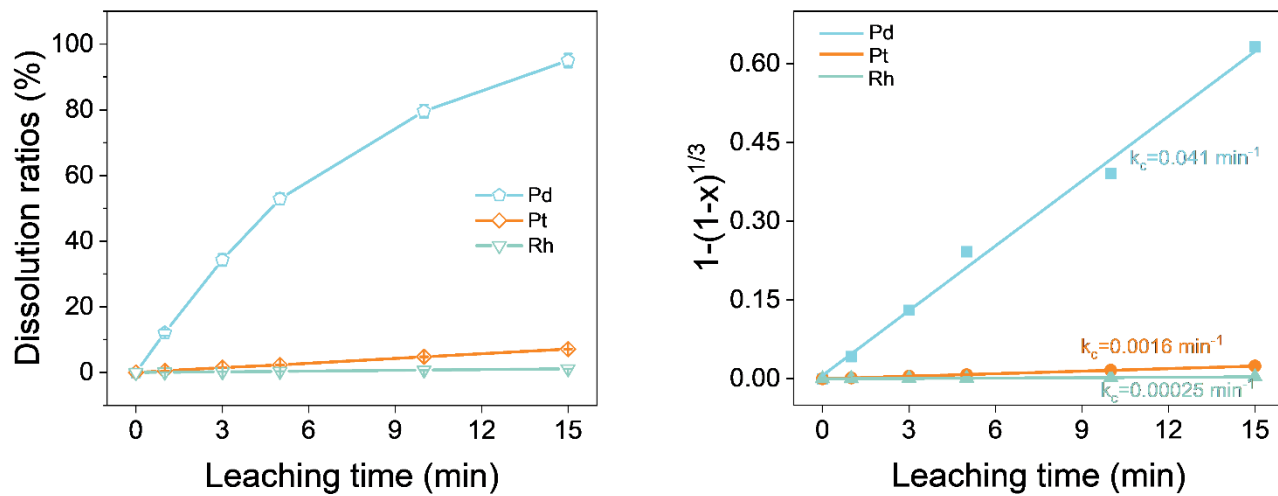

**Figure S1.** Dissolution ratios and leaching efficiencies of PGMs in  $\text{AlCl}_3 \cdot 6\text{H}_2\text{O}$  solution (100 °C).

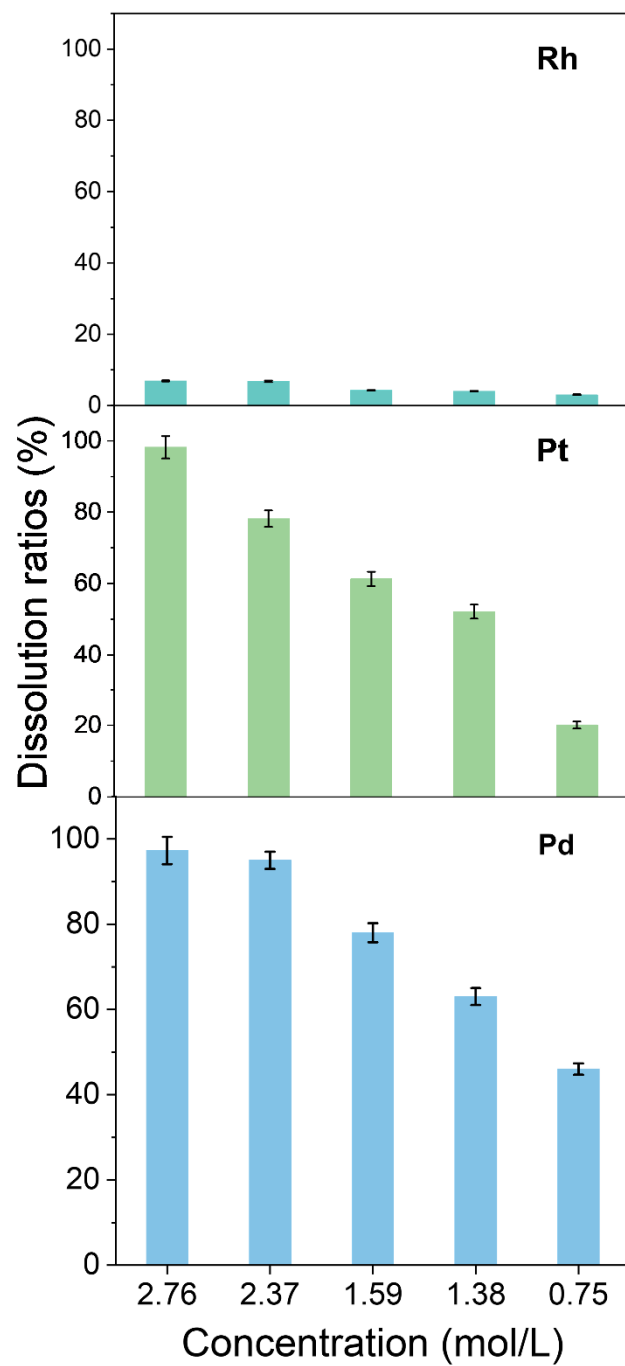

**Figure S2.** Dissolution ratios of PGMs with varied concentrations of  $\text{AlCl}_3 \cdot 6\text{H}_2\text{O}$

solutions (120 °C, 120 min).

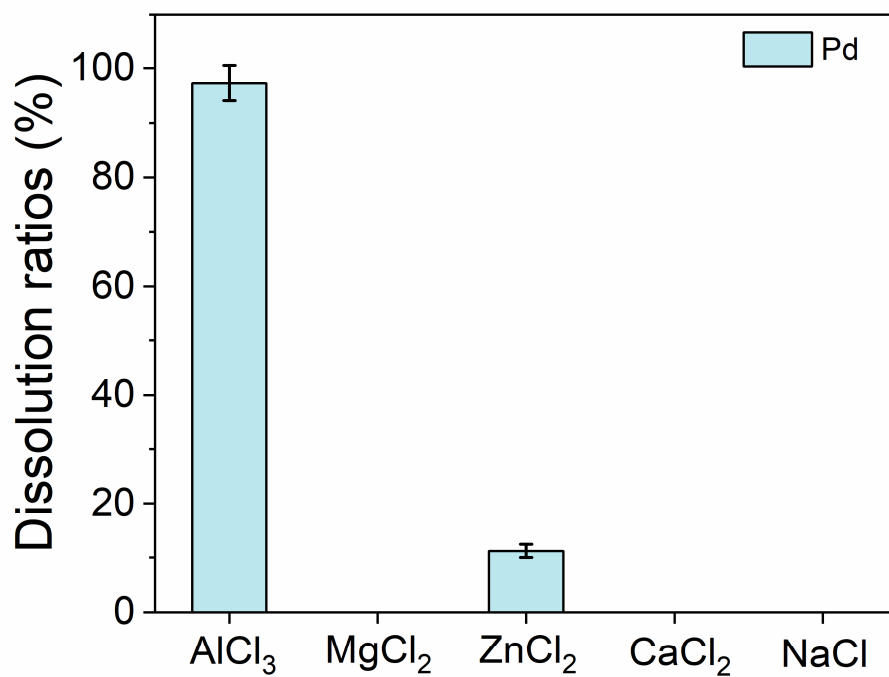

**Figure S3.** Dissolution ratios of Pd in five chloride salts with microwave-assisted (120 °C, 120 min).

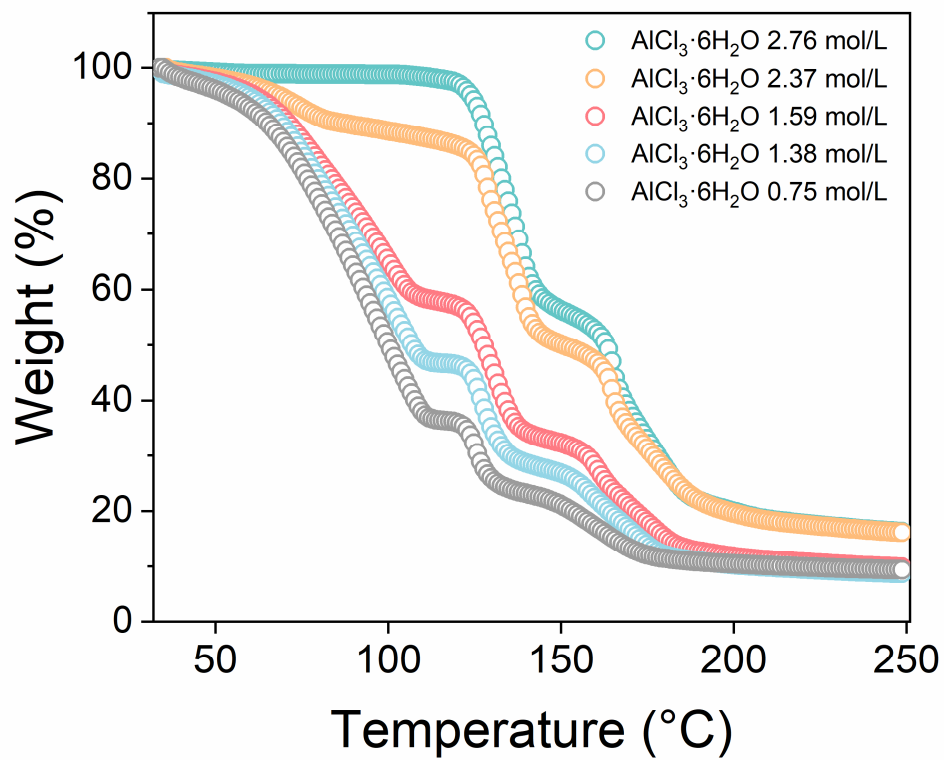

**Figure S4.** TG curves of  $\text{AlCl}_3 \cdot 6\text{H}_2\text{O}$  solutions with different concentrations.

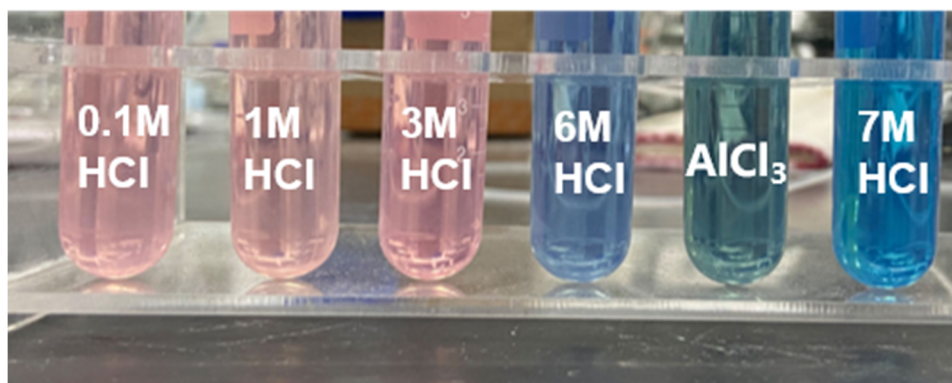

**Figure S5.** Photo of  $\text{CoCl}_2$  in  $\text{HCl}$  and  $\text{AlCl}_3$  solutions.



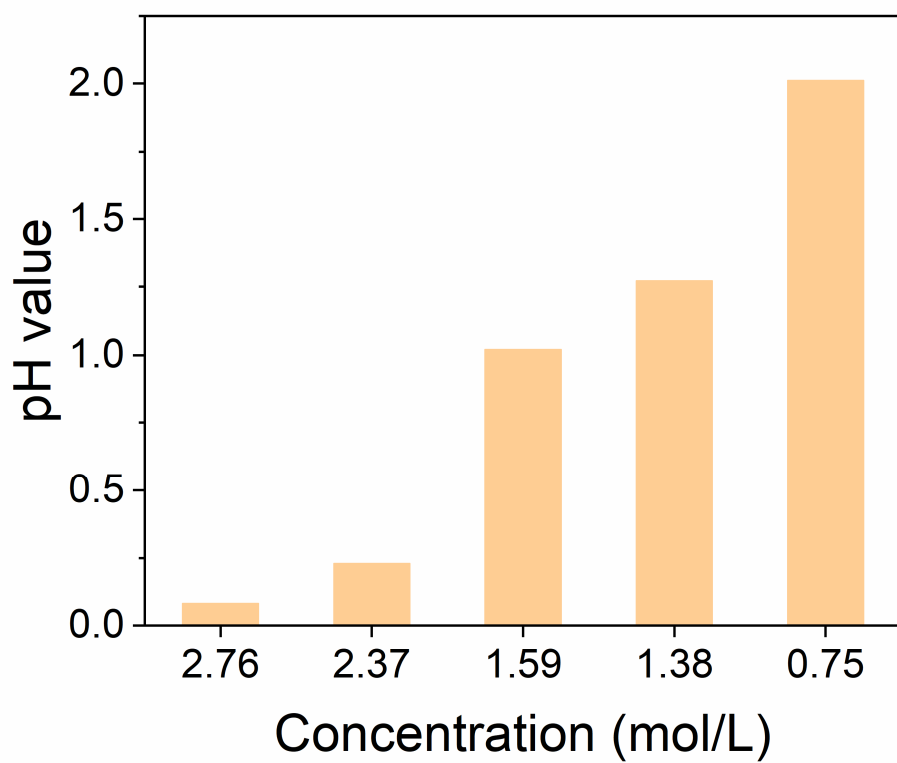

**Figure S6.** pH values of AlCl<sub>3</sub> solutions with varied concentrations.

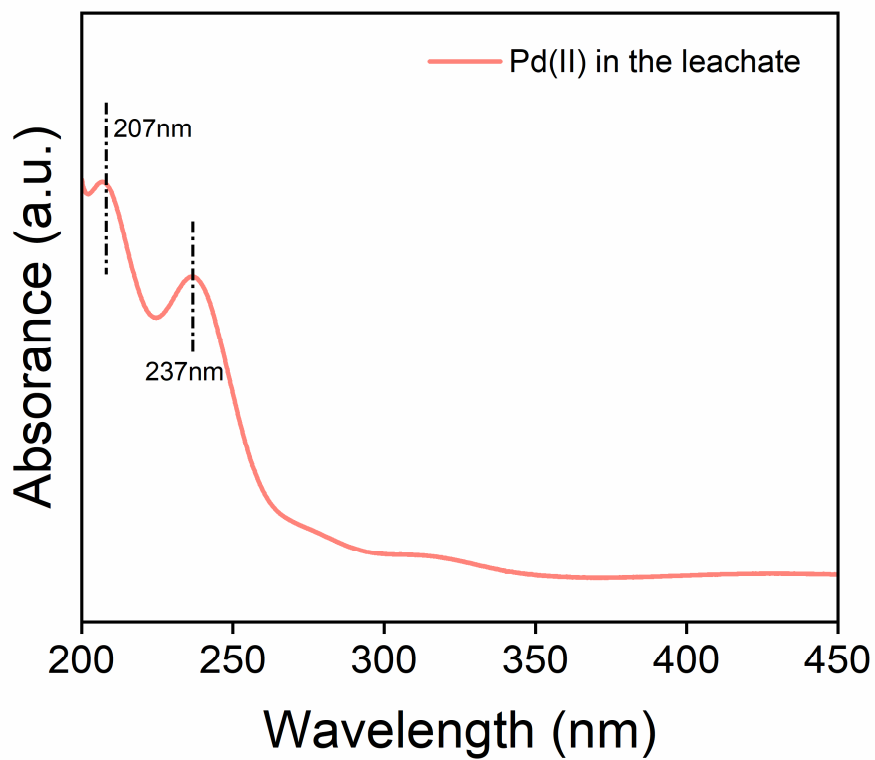

**Figure S7.** UV-vis spectra of Pd(II) in the leachate.

**Supplementary Tables**

**Table S1.** Comparison of this work with other methods in the precious metal recovery reaction reported in literature

| Lixiviant                                                                    | Treatment                         | PMs            | Energy consumption kWh/g PM | Chemicals consumption \$/g PM | Secondary waste                                                 | Ref. |
|------------------------------------------------------------------------------|-----------------------------------|----------------|-----------------------------|-------------------------------|-----------------------------------------------------------------|------|
| NaCN/NaOH                                                                    | leaching (20 °C 24 h)             | Au<br>Ag       | N/A                         | 56.3                          | cyanide/NaOH                                                    | 1    |
| thiourea/FeCl <sub>3</sub>                                                   | leaching (25 °C 2 h)              | Au<br>Ag       | N/A                         | 32.1                          | thiourea/FeCl <sub>3</sub>                                      | 2    |
| acetonitrile/Ph <sub>3</sub> PCl <sub>2</sub> /H <sub>2</sub> O <sub>2</sub> | leaching (3 min)                  | Au             | N/A                         | 79.2                          | acetonitrile/Ph <sub>3</sub> PO                                 | 3    |
| HCl/H <sub>2</sub> O <sub>2</sub>                                            | leaching (25 °C 45 min)           | Au             | N/A                         | 18.9                          | HCl/Cl <sub>2</sub> (aq)                                        | 4    |
| I <sub>2</sub> /I <sup>-</sup> /H <sub>2</sub> O <sub>2</sub>                | leaching (25 °C 4 h)              | Au             | N/A                         | 18.2                          | I <sub>2</sub> (aq)/I <sup>-</sup>                              | 5    |
| H <sub>2</sub> SO <sub>4</sub> /H <sub>2</sub> O <sub>2</sub>                | leaching (25 °C 4 h)              | Au             | N/A                         | 21.3                          | H <sub>2</sub> SO <sub>4</sub>                                  | 6    |
| HCl/Cl <sub>2</sub>                                                          | leaching (30 °C 90 min 1250 rpm)  | Au             | 69.6                        | 30.7                          | HCl/Cl <sub>2</sub> (aq)                                        | 7    |
| DMF/CuCl <sub>2</sub> /CaCl <sub>2</sub>                                     | leaching (75 °C 10 min)           | Au             | 35.2                        | 45.6                          | DMF/Cu <sup>2+</sup> /Ca <sup>2+</sup> /Cl <sup>-</sup>         | 8    |
| CH <sub>3</sub> CN/TiO <sub>2</sub>                                          | photocatalyzed leaching (24 h)    | Au<br>Ag       | 480                         | 45.3                          | CH <sub>3</sub> CN                                              | 9    |
| trihexyl(tetradecyl)phosphonium trihalide ionic liquids                      | leaching (65 °C 24 h 100 rpm)     | Au             | 78.3                        | 88.3                          | [P <sub>66614</sub> ][Cl <sub>3</sub> ]                         | 10   |
| NH <sub>4</sub> Br/TiO <sub>2</sub>                                          | photocatalyzed leaching (120 min) | Pd<br>Au       | 400                         | 15.4                          | NH <sub>4</sub> Br/Br <sub>2</sub> (aq)                         | 11   |
| Al(NO <sub>3</sub> ) <sub>3</sub> /AlCl <sub>3</sub>                         | leaching (80 °C 15 min 350 rpm)   | Pd<br>Pt<br>Rh | 42.8                        | 21.3                          | Al <sup>3+</sup> /NO <sub>3</sub> <sup>-</sup> /Cl <sup>-</sup> | 12   |

|                                                     |                                                          |                |      |      |                                                                |              |
|-----------------------------------------------------|----------------------------------------------------------|----------------|------|------|----------------------------------------------------------------|--------------|
| $\text{Al}(\text{NO}_3)_3/\text{NaCl}$              | leaching<br>(80 °C 180<br>min 500<br>rpm)                | Pd<br>Au       | 65.3 | 22.8 | $\text{Al}^{3+}/\text{NO}_3^-/\text{Cl}^-$                     | 13           |
| $\text{CH}_3\text{CN}/\text{FeCl}_3$                | leaching<br>(70 °C 180<br>min )                          | Pd<br>Pt<br>Rh | 38.2 | 24.1 | $\text{CH}_3\text{CN}/\text{Fe}^{3+}/\text{Cl}^-$              | 14           |
| $\text{HNO}_3/\text{aqua regia}$                    | leaching<br>(80 °C 1.5<br>h )                            | Pt             | 35.6 | 20.4 | $\text{HNO}_3/\text{aqua regia}$                               | 15           |
| $\text{H}_2\text{SO}_4/\text{NaCl}/\text{NaClO}_3$  | leaching<br>(40 °C 2 h )                                 | Au             | 8.9  | 19.8 | $\text{H}_2\text{SO}_4/\text{Na}^+/\text{Cl}^-/\text{ClO}_3^-$ | 16           |
| $(\text{NH}_4)_2\text{S}_2\text{O}_3/\text{CuSO}_4$ | leaching<br>(25 °C 8 h<br>250 rpm )                      | Au             | 46.2 | 25.2 | sulfur<br>dioxide/<br>$\text{Cu}^{2+}/\text{SO}_4^-$           | 17           |
| $\text{AlCl}_3$                                     | Microwave-<br>assisted<br>leaching<br>(100 °C 30<br>min) | Pd<br>Pt       | 0.83 | 1.0  | $\text{Al}^{3+}/\text{Cl}^-$                                   | this<br>work |

**Table S2.** Mass composition in the spent three-way automobile catalyst.

| Element | Al    | Pd    | Pt    | Rh    | Si    |
|---------|-------|-------|-------|-------|-------|
| wt%     | 35.21 | 1.544 | 0.101 | 0.063 | 10.22 |

**Table S3.** The summary of the correction of Gibbs free energy ( $G_{\text{corr}}$ ), delta G and the single point energy ( $E_{\text{sp}}$ ).

| Filename                                                   | $G_{\text{corr}}$ (a.u.) | SP Energy (a.u.)     | G (a.u.)             | $\Delta G$ (a.u.)    | $\Delta G$ (kcal/mol) |
|------------------------------------------------------------|--------------------------|----------------------|----------------------|----------------------|-----------------------|
| R                                                          | 0.417239                 | -<br>1691.33684<br>5 | -<br>1690.91960<br>6 |                      |                       |
| TS                                                         | 0.41151                  | -<br>1691.31688<br>5 | -<br>1690.90537<br>5 | 0.01423121<br>8      | 8.93023167            |
| P                                                          | 0.347457                 | -<br>1691.30359<br>6 | -<br>1690.95613<br>9 | -<br>0.03653340<br>8 | -<br>22.9250787       |
| H <sub>3</sub> O+3H <sub>2</sub> O                         | 0.070528                 | -<br>305.581524<br>6 | -<br>305.510996<br>6 |                      |                       |
| AlOH(H <sub>2</sub> O) <sub>5</sub> <sup>2+</sup> 9H<br>2O | 0.309456                 | -<br>1385.69149<br>5 | -<br>1385.38203<br>9 |                      |                       |

**Table S4.** Mass composition of recovered Pd product.

| Element | Pd   | Pt  | Rh | Na | Al  | Si | B | Total |
|---------|------|-----|----|----|-----|----|---|-------|
| wt%     | 99.1 | 0.6 | 0  | 0  | 0.3 | 0  | 0 | 100   |

**Table S5.** Mass composition of recovered Pt product.

| Element | Pt   | Pd   | Rh   | Na | Al   | Si | B | Total |
|---------|------|------|------|----|------|----|---|-------|
| wt%     | 98.8 | 0.89 | 0.04 | 0  | 0.27 | 0  | 0 | 100   |



**Table S6.** Mass composition of recovered Pd product in scale-up experiments (cycle 0).

| Element | Pd    | C | Al   | Na   | B | Total |
|---------|-------|---|------|------|---|-------|
| wt%     | 99.86 | 0 | 0.11 | 0.03 | 0 | 100   |

**Table S7.** The cost in bulk for leaching reagents.

| <b>Method</b>                                                                                                                                                                                                      | <b>Material</b>                           | <b>Source</b>                                                                                  | <b>Cost</b>                                                                            | <b>Minimum Cost</b>        |
|--------------------------------------------------------------------------------------------------------------------------------------------------------------------------------------------------------------------|-------------------------------------------|------------------------------------------------------------------------------------------------|----------------------------------------------------------------------------------------|----------------------------|
| Microwave-assisted<br>Dissolution                                                                                                                                                                                  | $\text{AlCl}_3 \cdot 6\text{H}_2\text{O}$ | Sigma-Aldrich Co.<br>General Reagent Co.<br>Macklin Biochemical<br>Technology Co.              | 17.39 \$ $\text{kg}^{-1}$<br>12.64 \$ $\text{kg}^{-1}$<br>13.98 \$ $\text{kg}^{-1}$    | 12.64 \$ $\text{kg}^{-1}$  |
|                                                                                                                                                                                                                    | $\text{NaBH}_4$                           | Adamas Reagent Co.<br>Runjing Chemical<br>Reagent Co.<br>Macklin Biochemical<br>Technology Co. | 800.23 \$ $\text{kg}^{-1}$<br>780.21 \$ $\text{kg}^{-1}$<br>813.77 \$ $\text{kg}^{-1}$ | 780.21 \$ $\text{kg}^{-1}$ |
| Note: Due to regional variations in personnel costs, operating processes, reagent prices, and environmental expenses, there are certain mistakes in the economic assessment of the dissolution of precious metals. |                                           |                                                                                                |                                                                                        |                            |

## REFERENCES

1. P. Quinet, J. Proost, A. V. Lierde, Recovery of precious metals from electronic scrap by hydrometallurgical processing routes. *Miner. Metall. Process.* **2005**, 22, 1.
2. J.-Y. Li, X.-L. Xu, W.-Q. Liu, Thiourea leaching gold and silver from the printed circuit boards of waste mobile phones. *Waste Manage.* **2012**, 32, 1209-1212.
3. E. D. Doidge, I. Carson, P. A. Tasker, R. J. Ellis, C. A. Morrison, J. B. Love, A simple primary amide for the selective recovery of gold from secondary resources. *Angew. Chem. Int. Ed. Engl.* **2016**, 55, 12436-12439.
4. T. B. Gontijo, D. Majuste, Selective acid leaching of connector pins removed from waste central processing units with focus on gold recovery. *Hydrometallurgy* **2020**, 196, 105432.
5. H. Xu, X. Y. Bi, X. M. Ngo, K.-L. Yang, Principles of detecting vaporous thiols using liquid crystals and metal ion microarrays. *Analyst.* **2009**, 134, 911-915.
6. P. Zhu, G. B. Gu, Recovery of gold and copper from waste printed circuits. Chinese. *J. Rare Metals* **2002**, 26, 214-216.
7. D. Tokkan, B. Donmez, O. N. Ata, The leaching kinetics of gold from gold scraps in Cl<sub>2</sub>-saturated HCl solutions. *Pamukkale Univ Muh Bilim Derg* **2019**, 25, 893-898.
8. R. X. Wang, C. L. Zhang, Y. F. Zhao, Y. J. Zhou, E. Ma, J. F. Bai, J. W. Wang, Recycling gold from printed circuit boards gold-plated layer of waste mobile phones in “mild aqua regia” system. *J. Cleaner Prod.* **2021**, 278.

9. Y. Chen, M. J. Xu, J. Y. Wen, Y. Wan, Q. F. Zhao, X. Cao, Y. Ding, Z. L. Wang, H. X. Li, Z. F. Bian, Selective recovery of precious metals through photocatalysis. *Nat. Sustain.* **2021**, 4, 618-626.
10. A. V. Bossche, N. R. Rodriguez, S. Riano, W. Dehaen, K. Binnemans, Dissolution behavior of precious metals and selective palladium leaching from spent automotive catalysts by trihalide ionic liquids. *RSC Adv.* **2021**, 11, 10110.
11. J. Z. Cao, Y. Chen, H. J. Shang, X. Chen, Q. Y. Qiao, H. X. Li, Z. F. Bian, Aqueous photocatalytic recycling of gold and palladium from waste electronics and catalysts. *ACS ES&T Engg.* **2022**, 2, 1445-1453.
12. F. Forte, S. Riano, K. Binnemans, Dissolution of noble metals in highly concentrated acidic salt solutions. *Chem. Commun.* **2020**, 56, 8230-8232.
13. A. T. Ding, M. Li, C. Y. Liu, X. W. Zhang, L. C. Lei, C. L. Xiao, Salt aqua regia as a green solvent for recovering precious metals. *Cell Rep. Phy. Sci.* **2022**, 3, 101159.
14. V. T. Nguyen, S. Riano, E. Aktan, C. Deferm, J. Fransaer, K. Binnemans, Solvometallurgical recovery of platinum group metals from spent automotive catalysts. *ACS Sustainable Chem. Eng.* **2021**, 9, 337-350.
15. A. Luyima, H. L. Shi, L. F. Zhang, Leaching studies for metals recovery from waste printed wiring boards. *JOM* **2011**, 63.
16. Y. C. He, Z. M. Xu, Recycling gold and copper from waste printed circuit boards using chlorination process. *RSC Adv.* **2015**, 5, 8957.

17. A. Tripathi, M. Kumar, D. C. Sau, A. Agrawal, S. Chakravarty, T. R. Mankhand, Leaching of gold from the waste mobile phone printed circuit board (PCBs) with ammonium thiosulphate. *International Journal of Metallurgical Engineering* **2012**, 1, 17-21.
